# Supplementary material for: Nearly spherical CoP nanoparticle/carbon nanosheet hybrids: a high-performance trifunctional electrocatalyst for oxygen reduction and water splitting
Source: Royal Society of Chemistry journal article supplement (doi:10.1039/c9ra07334e), 2019-01-01
Supplement: c9ra07334e1.pdf [file c9ra07334e1.pdf]

## Supporting information

### Nearly spherical CoP nanoparticle /carbon nanosheet hybrids: high-performance trifunctional electrocatalyst for oxygen reduction and water splitting

Wenjian Zou<sup>a</sup>, Kunpeng Dou<sup>b</sup>, Qi Jiang<sup>a</sup>, Jiadong Xiang<sup>a</sup>, Chao-Cheng Kaun<sup>c</sup>, Hao Tang<sup>a\*</sup>

<sup>a</sup> State Key Laboratory of Advanced Technology for Materials Synthesis and Processing, International School of Materials Science and Engineering, Wuhan University of Technology, Wuhan 430070, People's Republic of China

<sup>b</sup> College of Information Science and Engineering, Ocean University of China, Qingdao 266100, People's Republic of China

<sup>c</sup> Research Center for Applied Sciences, Academia Sinica, Taipei 11529

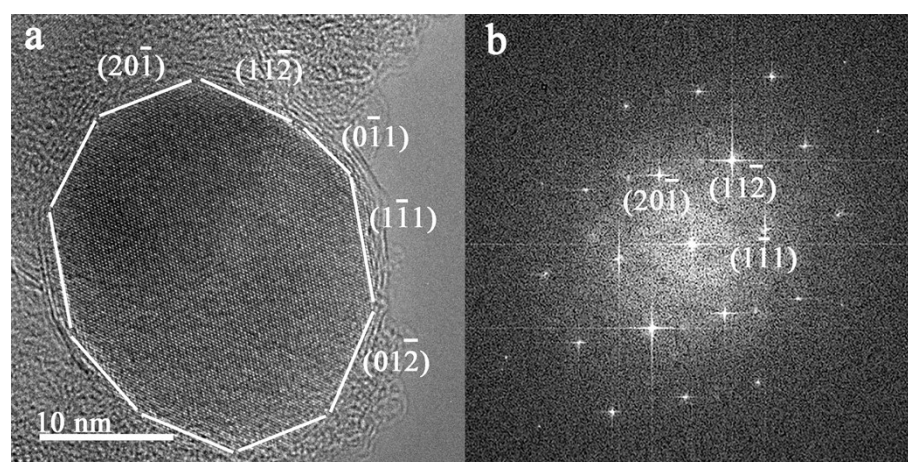

Figure S1. Structure of CoP nanoparticle. (a) HRTEM image of CoP nanocrystalline along [132] zone axis and; (b) corresponding FFT image of (a).

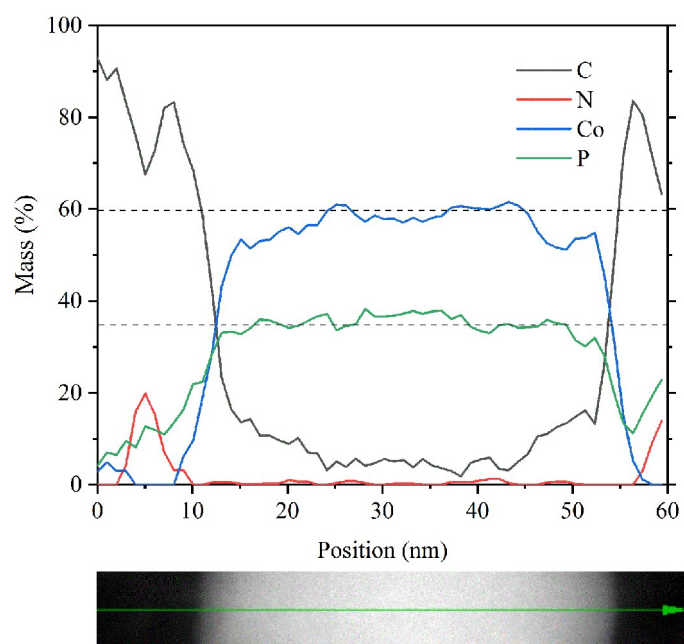

Figure S2. EDS linear scan result of the CoP NPs/CNSs.

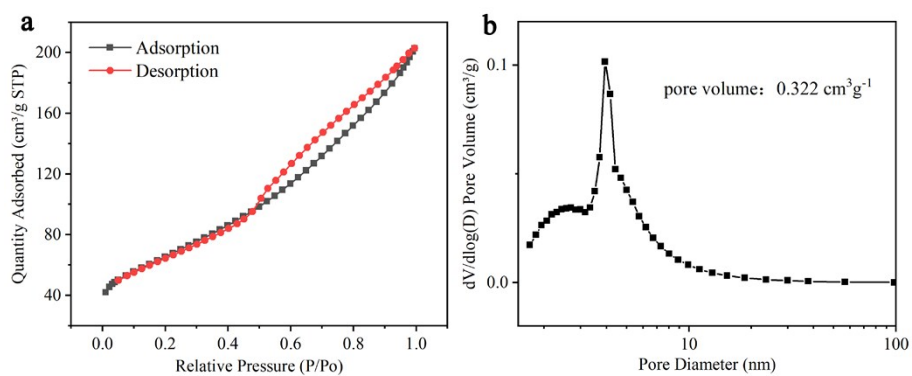

Figure S3. (a) Nitrogen adsorption-desorption curve. (b) pore-diameter distribution.

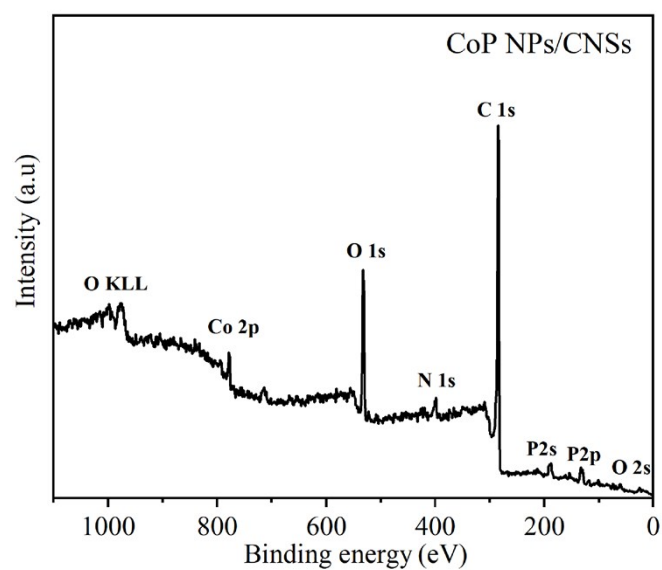

Figure S4. XPS spectra of CoP NPs/CNSs.

Table S1 The content ratio of each kind of nitrogen.

|             | Binding energy (eV) | Content (%) |
|-------------|---------------------|-------------|
| Pyridinic-N | 398.8               | 40.5        |
| Pyrrolic-N  | 401.1               | 42.7        |
| Graphite-N  | 402.2               | 11.1        |
| Oxidized-N  | 404.8               | 5.7         |

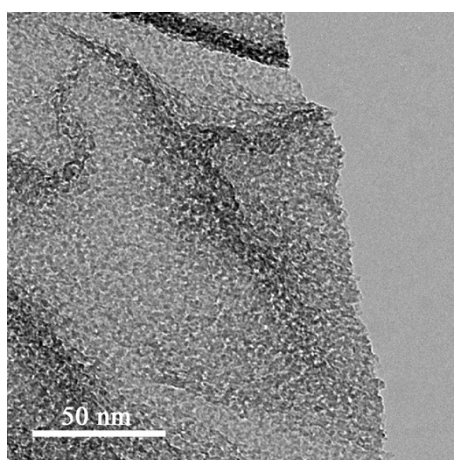

Figure S5. HRTEM image of CNSs

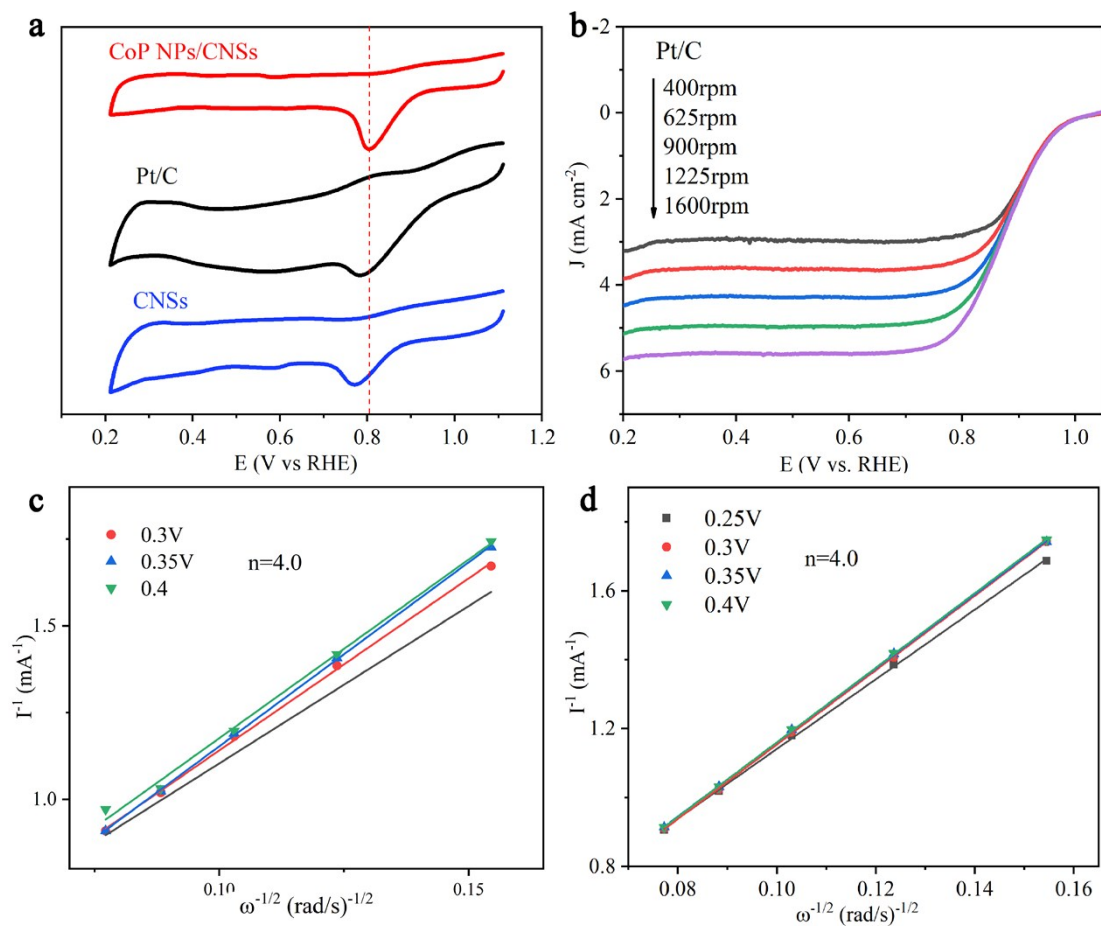

Figure S6. Electrocatalytic properties of the electrodes. (a) CV curves of CoP NPs/CNSs, CNSs and Pt/C catalyst in  $O_2$ -saturated 0.1 M KOH. (b) LSV curves of Pt/C at different rotation rates in rpm. (c) K-L plot of CoP NPs/CNSs. (d) K-L plot of Pt/C

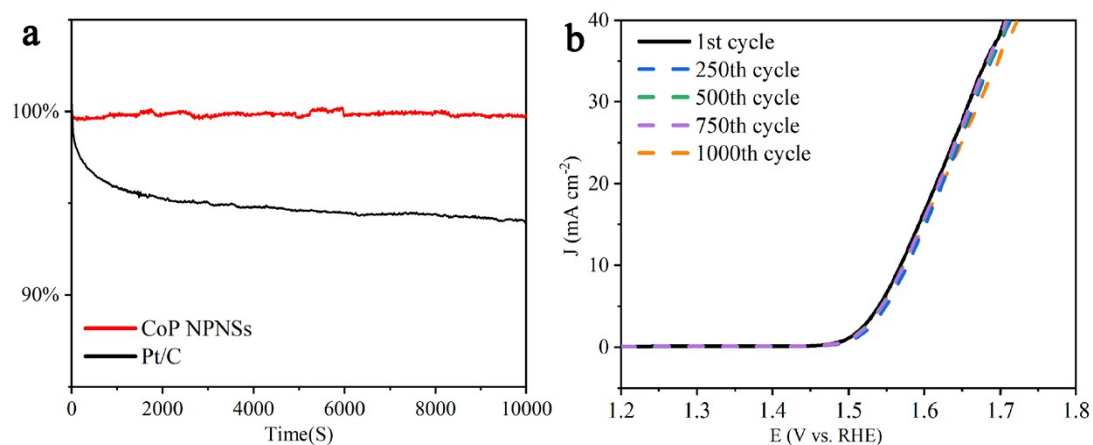

Figure S7. Stability of the catalysts. (a) I-T curve of CoP NPs/CNSs. (b) LSV curve of CoP NPs/CNSs before and after 1000 potential cycles under 1 M KOH

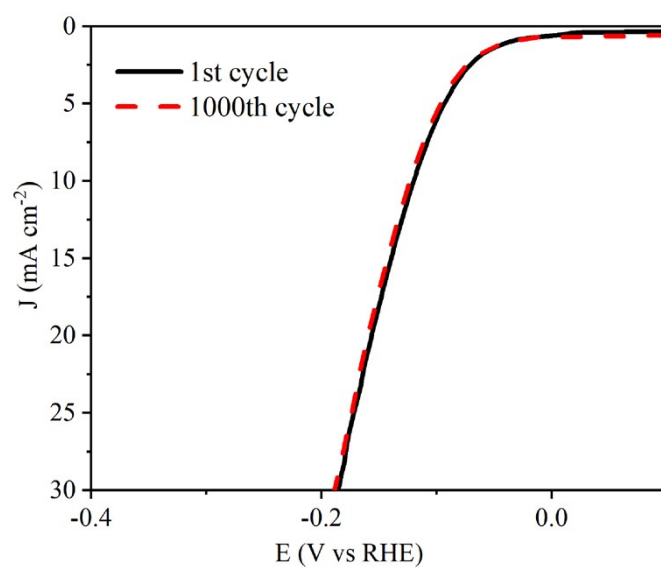

Figure S8. LSV curve of CoP NPs/CNSs before and after 1000 potential cycles under 1 M KOH

Table S2 OER, ORR and HER properties of CoP nanoparticles in alkaline condition reported in previous studies and our work.

| <div> <div>Facets</div> <div>Properties</div> </div> |                                                | CoP(CoP-DC)<br>with (111) and<br>(101)<br>facets[12] | colloidal CoP<br>nanocrystals<br>with (211)<br>facets [9] | CoP<br>nanocrystals<br>with (011)<br>facets [7] | CoP nanowire<br>with (200)<br>facets [8] | Ultrathin CoP<br>nanosheet<br>(011) and (111)<br>facets [6] | This work |
|------------------------------------------------------|------------------------------------------------|------------------------------------------------------|-----------------------------------------------------------|-------------------------------------------------|------------------------------------------|-------------------------------------------------------------|-----------|
| ORR<br>properties                                    | electrolyte                                    | 0.1M KOH                                             | 0.1M KOH                                                  | 0.1M KOH                                        | /                                        | /                                                           | 0.1M KOH  |
|                                                      | Onset potential<br>(V)                         | 0.81                                                 | 0.92                                                      | 0.8                                             | /                                        | /                                                           | 0.92      |
|                                                      | Half wave<br>potential (V)                     | 0.76                                                 | 0.858                                                     | 0.7                                             | /                                        | /                                                           | 0.88      |
|                                                      | Tafel plot                                     | /                                                    | 72.1                                                      | 51                                              | /                                        | /                                                           | 89        |
|                                                      | Diffusion<br>current<br>(mA cm <sup>-2</sup> ) | 5.3                                                  | 4.64                                                      | 4.5                                             | /                                        | /                                                           | 5.4       |
| OER<br>properties                                    | electrolyte                                    | 0.1 KOH                                              | 1M KOH                                                    | /                                               | 1M KOH                                   | /                                                           | 1M KOH    |
|                                                      | Overpotential<br>(mV)                          | 320@10mA                                             | 280@10mA<br>(Co <sub>2</sub> P)                           | /                                               | 248@10mA<br>300@100mA                    |                                                             | 340@10mA  |
|                                                      | Tafel plot<br>(mV dec <sup>-1</sup> )          | 52.5                                                 | /                                                         | /                                               | 78                                       | /                                                           | 102.1     |
|                                                      | ΔE (V)                                         | 0.76                                                 | /                                                         | /                                               | /                                        | /                                                           | 0.84      |
| HER<br>properties                                    | electrolyte                                    | /                                                    | 1M KOH                                                    | /                                               | /                                        | 1M KOH                                                      | 1M KOH    |
|                                                      | Overpotential<br>(10mA)                        | /                                                    | 62.5                                                      | /                                               | /                                        | 154                                                         | 115       |
|                                                      | Overpotential<br>(20mA)                        | /                                                    | /                                                         | /                                               | 150                                      | 181                                                         | 150       |
|                                                      | Overpotential<br>(100mA)                       | /                                                    | /                                                         | /                                               | 240                                      | /                                                           | 290       |
|                                                      | Tafel plot<br>(mV dec <sup>-1</sup> )          | /                                                    | /                                                         | /                                               | 105                                      | 72                                                          | 90        |

Table S3 Calculated Gibbs free energy for various surfaces of CoP during OER.

| Facets | $\Delta G_1^0$<br>(eV) | $\Delta G_2^0$<br>(eV) | $\Delta G_3^0$<br>(eV) | $\Delta G_4^0$<br>(eV) |
|--------|------------------------|------------------------|------------------------|------------------------|
| 101    | 0.253                  | 1.689                  | 1.787                  | 1.794                  |
| 111    | -0.531                 | 0.836                  | 3.317                  | 1.901                  |
| 112    | 0.530                  | -0.037                 | 3.957                  | 1.073                  |
| 201    | 0.736                  | 0.582                  | 2.629                  | 1.576                  |
| 210    | -0.120                 | 1.284                  | 2.675                  | 1.684                  |
| 012    | 1.612                  | 0.098                  | 2.502                  | 1.312                  |
| 311    | -0.387                 | 1.029                  | 2.577                  | 2.304                  |
| 011    | 3.327                  | -2.751                 | 3.337                  | 1.610                  |

Table S4 Calculated Gibbs free energy of Co-Co bridge sites, P top sites and Co-P bridge sites for various CoP surfaces during HER.

| Active sites | Facets | G <sub>0</sub><br>(eV) | G <sub>1</sub><br>(eV) | G <sub>2</sub><br>(eV) | G <sub>3</sub><br>(eV) |
|--------------|--------|------------------------|------------------------|------------------------|------------------------|
| Co-Co bridge | 101    | 0                      | 0.375                  | 0.051                  | 0                      |
|              | 111    | 0                      | 0.002                  | -0.466                 | 0                      |
|              | 112    | 0                      | 0.084                  | 0.187                  | 0                      |
|              | 201    | 0                      | -0.873                 | -0.513                 | 0                      |
|              | 210    | 0                      | 0.605                  | -0.300                 | 0                      |
|              | 012    | 0                      | 1.061                  | 0.347                  | 0                      |
|              | 311    | 0                      | -0.105                 | -0.284                 | 0                      |
|              | 011    | 0                      | 0.350                  | 0.461                  | 0                      |
| P top        | 101    | 0                      | 0.344                  | 0.179                  | 0                      |
|              | 111    | 0                      | -0.450                 | 0.409                  | 0                      |
|              | 112    | 0                      | 0.498                  | 0.029                  | 0                      |
|              | 201    | 0                      | -0.509                 | -0.199                 | 0                      |
|              | 210    | 0                      | 0.945                  | 0.530                  | 0                      |
|              | 012    | 0                      | 0.380                  | 0.356                  | 0                      |
|              | 311    | 0                      | 0.096                  | -0.253                 | 0                      |
|              | 011    | 0                      | 0.027                  | 0.135                  | 0                      |
| Co-P bridge  | 101    | 0                      | 0.615                  | 0.181                  | 0                      |
|              | 111    | 0                      | -0.394                 | 0.230                  | 0                      |
|              | 112    | 0                      | 0.832                  | 0.296                  | 0                      |
|              | 201    | 0                      | 0.555                  | -0.200                 | 0                      |
|              | 210    | 0                      | -0.013                 | 0.363                  | 0                      |
|              | 012    | 0                      | 0.658                  | 0.054                  | 0                      |
|              | 311    | 0                      | -0.122                 | 0.425                  | 0                      |
|              | 011    | 0                      | 0.028                  | 0.135                  | 0                      |
